# Supplementary material for: Manufactured solutions and the verification of three-dimensional Stokes ice-sheet models
Source: Copernicus journal article supplement (doi:10.5194/tc-7-19-2013), 2013-01-04
Supplement: Supplementary file 1 [file tc-7-19-2013-supplement.zip]

## Appendix: Calculation of the Compensation Terms for the Paper “*Manufactured Solutions and the Verification of Three-dimensional Stokes Ice-Sheet Models*”

The compensation terms

$$F_1 = \frac{\partial(2\mu\frac{\partial u}{\partial x} - p)}{\partial x} + \frac{\partial(\mu(\frac{\partial u}{\partial y} + \frac{\partial v}{\partial x}))}{\partial y} + \frac{\partial(\mu(\frac{\partial u}{\partial z} + \frac{\partial w}{\partial x}))}{\partial z}, \quad (\text{A1})$$

$$F_2 = \frac{\partial(\mu(\frac{\partial u}{\partial y} + \frac{\partial v}{\partial x}))}{\partial x} + \frac{\partial(2\mu\frac{\partial v}{\partial y} - p)}{\partial y} + \frac{\partial(\mu(\frac{\partial v}{\partial z} + \frac{\partial w}{\partial y}))}{\partial z}, \quad (\text{A2})$$

$$F_3 = \frac{\partial(\mu(\frac{\partial u}{\partial z} + \frac{\partial w}{\partial x}))}{\partial x} + \frac{\partial(\mu(\frac{\partial w}{\partial y} + \frac{\partial v}{\partial z}))}{\partial y} + \frac{\partial(2\mu\frac{\partial w}{\partial z} - p)}{\partial z} - \rho g \quad (\text{A3})$$

need to be added to the right-hand sides of the three components of the momentum equation (1)-(3), respectively. and the following terms, denoted as  $T_1, T_2, T_3$ , :

$$T_1 = \frac{1}{r_s} \left[ -\frac{\partial s}{\partial x} \left( 2\mu \frac{\partial u}{\partial x} - p \right) - \frac{\partial s}{\partial y} \mu \left( \frac{\partial u}{\partial y} + \frac{\partial v}{\partial x} \right) + \mu \left( \frac{\partial u}{\partial z} + \frac{\partial w}{\partial x} \right) \right], \quad (\text{A4})$$

$$T_2 = \frac{1}{r_s} \left[ -\frac{\partial s}{\partial x} \mu \left( \frac{\partial u}{\partial y} + \frac{\partial v}{\partial x} \right) - \frac{\partial s}{\partial y} \left( 2\mu \frac{\partial v}{\partial y} - p \right) + \mu \left( \frac{\partial v}{\partial z} + \frac{\partial w}{\partial y} \right) \right], \quad (\text{A5})$$

$$T_3 = \frac{1}{r_s} \left[ -\frac{\partial s}{\partial x} \mu \left( \frac{\partial u}{\partial z} + \frac{\partial w}{\partial x} \right) - \frac{\partial s}{\partial y} \mu \left( \frac{\partial w}{\partial y} + \frac{\partial v}{\partial z} \right) + \left( 2\mu \frac{\partial w}{\partial z} - p \right) \right], \quad (\text{A6})$$

where  $r_s = \sqrt{1 + (\frac{\partial s}{\partial x})^2 + (\frac{\partial s}{\partial y})^2}$ , need to be added into the right-hand sides of the three components of the top surface boundary equations (9)-(11), respectively.

Now let us present explicit formulas for calculating these compensation terms for the manufactured solution under the specific geometry derived in Section 3.2, i.e., the velocity solution (54)-(56) and the pressure solution (44) with the ice-sheet geometry having the surface elevation (48) and the bedrock elevation (46) on the domain, and a specific accumulation rate (50). In addition, we also fix  $\lambda_2 = 4$  for the purpose of simplifying the formulas of the compensation terms except  $\gamma_1 = 0$ ,  $\lambda_1 = 4$ ,  $c_{b1} = 0$ ,  $c_{b2} = 0$  as chosen for the specific sample solution in Section 3.2. Thus the remaining free parameters are only  $c_1$ ,  $c_2$  and  $c_t$ .

Computation of the compensation terms in numerical codes requires the value of  $u, v, w, p, \mu$  and their derivatives. Furthermore,  $u, v, w, p, \mu$  all can be expressed as the functions of  $s(x, y, t)$ ,  $b(x, y)$ ,  $h(x, y, t) = s - b$ ,  $d(x, y, z, t) = \frac{s-z}{s-b}$ , and the special term  $q(x, y, t)$  (resulting from integration), and some of their derivatives.

First, let us write down explicit expressions for  $s, b, d, q$ , and some needed derivatives in the following. Note that  $h = s - b$ , thus all derivatives of  $h$  are directly the differences of corresponding

derivatives of  $s$  and  $b$  and we will skip those. Recalled that  $\xi(t) = 1 - e^{-c_t t}$ , then

$$s = -x \tan(\alpha) + \frac{1}{2} Z \sin\left(\frac{2\pi x}{L}\right) \sin\left(\frac{2\pi y}{L}\right) \xi(t), \quad (\text{A7})$$

$$s_x = -\tan(\alpha) + Z \cos\left(\frac{2\pi x}{L}\right) \pi \sin\left(\frac{2\pi y}{L}\right) \xi(t) \frac{1}{L}, \quad (\text{A8})$$

$$s_y = Z \sin\left(\frac{2\pi x}{L}\right) \pi \cos\left(\frac{2\pi y}{L}\right) \xi(t) \frac{1}{L}, \quad (\text{A9})$$

$$s_{xx} = -2Z \sin\left(\frac{2\pi x}{L}\right) \pi^2 \sin\left(\frac{2\pi y}{L}\right) \xi(t) \frac{1}{L^2}, \quad (\text{A10})$$

$$s_{xy} = 2Z \cos\left(\frac{2\pi x}{L}\right) \pi^2 \cos\left(\frac{2\pi y}{L}\right) \xi(t) \frac{1}{L^2}, \quad (\text{A11})$$

$$s_{yy} = -2Z \sin\left(\frac{2\pi x}{L}\right) \pi^2 \sin\left(\frac{2\pi y}{L}\right) \xi(t) \frac{1}{L^2}, \quad (\text{A12})$$

$$s_{xxx} = -4Z \cos\left(\frac{2\pi x}{L}\right) \pi^3 \sin\left(\frac{2\pi y}{L}\right) \xi(t) \frac{1}{L^3}, \quad (\text{A13})$$

$$s_{xxy} = -4Z \sin\left(\frac{2\pi x}{L}\right) \pi^3 \cos\left(\frac{2\pi y}{L}\right) \xi(t) \frac{1}{L^3}, \quad (\text{A14})$$

$$s_{xyy} = -4Z \cos\left(\frac{2\pi x}{L}\right) \pi^3 \sin\left(\frac{2\pi y}{L}\right) \xi(t) \frac{1}{L^3}, \quad (\text{A15})$$

$$s_{yyy} = -4Z \sin\left(\frac{2\pi x}{L}\right) \pi^3 \cos\left(\frac{2\pi y}{L}\right) \xi(t) \frac{1}{L^3}, \quad (\text{A16})$$

$$b = -x \tan(\alpha) + \frac{1}{2} Z \sin\left(\frac{2\pi x}{L}\right) \sin\left(\frac{2\pi y}{L}\right) - Z, \quad (\text{A17})$$

$$b_x = -\tan(\alpha) + Z \cos\left(\frac{2\pi x}{L}\right) \pi \sin\left(\frac{2\pi y}{L}\right) \frac{1}{L}, \quad (\text{A18})$$

$$b_y = Z \sin\left(\frac{2\pi x}{L}\right) \pi \cos\left(\frac{2\pi y}{L}\right) \frac{1}{L}, \quad (\text{A19})$$

$$b_{xx} = -2Z \sin\left(\frac{2\pi x}{L}\right) \pi^2 \sin\left(\frac{2\pi y}{L}\right) \frac{1}{L^2}, \quad (\text{A20})$$

$$b_{xy} = 2Z \cos\left(\frac{2\pi x}{L}\right) \pi^2 \cos\left(\frac{2\pi y}{L}\right) \frac{1}{L^2}, \quad (\text{A21})$$

$$b_{yy} = -2Z \sin\left(\frac{2\pi x}{L}\right) \pi^2 \sin\left(\frac{2\pi y}{L}\right) \frac{1}{L^2}, \quad (\text{A22})$$

$$b_{xxx} = -4Z \cos\left(\frac{2\pi x}{L}\right) \pi^3 \sin\left(\frac{2\pi y}{L}\right) \frac{1}{L^3}, \quad (\text{A23})$$

$$b_{xxy} = -4Z \sin\left(\frac{2\pi x}{L}\right) \pi^3 \cos\left(\frac{2\pi y}{L}\right) \frac{1}{L^3}, \quad (\text{A24})$$

$$b_{xyy} = -4Z \cos\left(\frac{2\pi x}{L}\right) \pi^3 \sin\left(\frac{2\pi y}{L}\right) \frac{1}{L^3}, \quad (\text{A25})$$

$$b_{yyy} = -4Z \sin\left(\frac{2\pi x}{L}\right) \pi^3 \cos\left(\frac{2\pi y}{L}\right) \frac{1}{L^3}, \quad (\text{A26})$$

$$q = \frac{1}{2}c_1 Z \cos\left(\frac{2\pi x}{L}\right) \cos\left(\frac{2\pi y}{L}\right) e^{-c_t t}, \quad (\text{A27})$$

$$q_x = -c_1 Z \sin\left(\frac{2\pi x}{L}\right) \pi \cos\left(\frac{2\pi y}{L}\right) e^{-c_t t} \frac{1}{L}, \quad (\text{A28})$$

$$q_y = -c_1 Z \cos\left(\frac{2\pi x}{L}\right) \pi \sin\left(\frac{2\pi y}{L}\right) e^{-c_t t} \frac{1}{L}, \quad (\text{A29})$$

$$q_{xx} = -2c_1 Z \cos\left(\frac{2\pi x}{L}\right) \pi^2 \cos\left(\frac{2\pi y}{L}\right) e^{-c_t t} \frac{1}{L^2}, \quad (\text{A30})$$

$$q_{xy} = 2c_1 Z \sin\left(\frac{2\pi x}{L}\right) \pi^2 \sin\left(\frac{2\pi y}{L}\right) e^{-c_t t} \frac{1}{L^2}, \quad (\text{A31})$$

$$q_{yy} = -2c_1 Z \cos\left(\frac{2\pi x}{L}\right) \pi^2 \cos\left(\frac{2\pi y}{L}\right) e^{-c_t t} \frac{1}{L^2}, \quad (\text{A32})$$

and

$$d = \frac{s-z}{h}, \quad d_x = \frac{s_x}{h} - \frac{(s-z)h_x}{h^2}, \quad d_y = \frac{s_y}{h} - \frac{(s-z)h_y}{h^2}, \quad d_z = -\frac{1}{h}, \quad (\text{A33})$$

$$d_{xx} = \frac{s_{xx}}{h} - 2\frac{s_x h_x}{h^2} + 2\frac{(s-z)h_x^2}{h^3} - \frac{(s-z)h_{xx}}{h^2}, \quad (\text{A34})$$

$$d_{xy} = \frac{s_{xy}}{h} - \frac{s_x h_y}{h^2} - \frac{s_y h_x}{h^2} + 2\frac{(s-z)h_x h_y}{h^3} - \frac{(s-z)h_{xy}}{h^2}, \quad d_{xz} = \frac{h_x}{h^2}, \quad (\text{A35})$$

$$d_{yy} = \frac{s_{yy}}{h} - 2\frac{s_y h_y}{h^2} + 2\frac{(s-z)h_y^2}{h^3} - \frac{(s-z)h_{yy}}{h^2}, \quad d_{yz} = \frac{h_y}{h^2}, \quad d_{zz} = 0, \quad (\text{A36})$$

$$d_{xxx} = \frac{s_{xxx}}{h} - 3\frac{s_{xx}h_x}{h^2} + 6\frac{s_x h_x^2}{h^3} - 3\frac{s_x h_{xx}}{h^2} - 6\frac{(s-z)h_x^3}{h^4} + 6\frac{(s-z)h_x h_{xx}}{h^3} - \frac{(s-z)h_{xxx}}{h^2}, \quad (\text{A37})$$

$$d_{xxy} = \frac{s_{xxy}}{h} - \frac{s_{xx}h_y}{h^2} - 2\frac{s_{xy}h_x}{h^2} + 4\frac{s_x h_x h_y}{h^3} - 2\frac{s_x h_{xy}}{h^2} + 2\frac{s_y h_x^2}{h^3} - 6\frac{(s-z)h_x^2 h_y}{h^4} + 4\frac{(s-z)h_x h_{xy}}{h^3} - \frac{s_y h_{xx}}{h^2} + 2\frac{(s-z)h_{xx}h_y}{h^3} - \frac{(s-z)h_{xxy}}{h^2}, \quad (\text{A38})$$

$$d_{xxz} = -2\frac{h_x^2}{h^3} + \frac{h_{xx}}{h^2}, \quad (\text{A39})$$

$$d_{xyy} = \frac{s_{xyy}}{h} - 2\frac{s_{xy}h_y}{h^2} + 2\frac{s_x h_y^2}{h^3} - \frac{s_x h_{yy}}{h^2} - \frac{s_{yy}h_x}{h^2} + 4\frac{s_y h_x h_y}{h^3} - 2\frac{s_y h_{xy}}{h^2} - 6\frac{(s-z)h_x h_y^2}{h^4} + 4\frac{(s-z)h_{xy}h_y}{h^3} + 2\frac{(s-z)h_x h_{yy}}{h^3} - \frac{(s-z)h_{xyy}}{h^2}, \quad (\text{A40})$$

$$d_{xyz} = -2\frac{h_x h_y}{h^3} + \frac{h_{xy}}{h^2}, \quad d_{xzz} = 0, \quad (\text{A41})$$

$$d_{yyy} = \frac{s_{yyy}}{h} - 3\frac{s_{yy}h_y}{h^2} + 6\frac{s_y h_y^2}{h^3} - 3\frac{s_y h_{yy}}{h^2} - 6\frac{(s-z)h_y^3}{h^4} + 6\frac{(s-z)h_y h_{yy}}{h^3} - \frac{(s-z)h_{yyy}}{h^2}, \quad (\text{A42})$$

$$d_{yyz} = -2\frac{h_y^2}{h^3} + \frac{h_{yy}}{h^2}, \quad d_{yzz} = 0, \quad d_{zzz} = 0. \quad (\text{A43})$$

Then, the velocity components  $u$ ,  $v$ ,  $w$  can be computed by using

$$u = c_1 (1 - d^4), \quad (\text{A44})$$

$$v = \frac{c_2}{h} (1 - d^4) - \frac{q}{h} (1 - d^4), \quad (\text{A45})$$

$$w = uhd_x + vhd_y, \quad (\text{A46})$$

and their derivatives can be expressed as

$$u_x = -4c_1 d^3 d_x, \quad u_y = -4c_1 d^3 d_y, \quad u_z = -4c_1 d^3 d_z, \quad (\text{A47})$$

$$u_{xx} = -12c_1 d^2 d_x^2 - 4c_1 d^3 d_{xx}, \quad u_{xy} = -12c_1 d^2 d_x d_y - 4c_1 d^3 d_{xy}, \quad (\text{A48})$$

$$u_{xz} = -12c_1 d^2 d_x d_z - 4c_1 d^3 d_{xz}, \quad u_{yy} = -12c_1 d^2 d_y^2 - 4c_1 d^3 d_{yy}, \quad (\text{A49})$$

$$u_{yz} = -12c_1 d^2 d_y d_z - 4c_1 d^3 d_{yz}, \quad u_{zz} = -12c_1 d^2 d_z^2 - 4c_1 d^3 d_{zz}, \quad (\text{A50})$$

$$v_x = \frac{-4c_2 d^3 d_x - q_x + q_x d^4 + 4q d^3 d_x}{h} - \frac{(c_2 - c_2 d^4 - q + q d^4) h_x}{h^2}, \quad (\text{A51})$$

$$v_y = \frac{-4c_2 d^3 d_y - q_y + q_y d^4 + 4q d^3 d_y}{h} - \frac{(c_2 - c_2 d^4 - q + q d^4) h_y}{h^2}, \quad (\text{A52})$$

$$v_z = \frac{-4c_2 d^3 d_z + 4q d^3 d_z}{h}, \quad (\text{A53})$$

$$\begin{aligned} v_{xx} = & \frac{1}{h} \left[ -12c_2 d^2 d_x^2 - 4c_2 d^3 d_{xx} - q_{xx} + q_{xx} d^4 + 8q_x d^3 d_x + 12q d^2 d_x^2 + 4q d^3 d_{xx} \right] \\ & + \frac{1}{h^2} \left[ -2 \left( -4c_2 d^3 d_x - q_x + q_x d^4 + 4q d^3 d_x \right) h_x - (c_2 - c_2 d^4 - q + q d^4) h_{xx} \right] \\ & + \frac{2}{h^3} \left[ (c_2 - c_2 d^4 - q + q d^4) h_x^2 \right], \end{aligned} \quad (\text{A54})$$

$$\begin{aligned} v_{xy} = & \frac{1}{h} \left[ -12c_2 d^2 d_x d_y - 4c_2 d^3 d_{xy} - q_{xy} + q_{xy} d^4 + 4q_x d^3 d_y + 4q_y d^3 d_x + 12q d^2 d_x d_y + 4q d^3 d_{xy} \right] \\ & + \frac{1}{h^2} \left[ - (c_2 - c_2 d^4 - q + q d^4) h_{xy} - (-4c_2 d^3 d_x - q_x + q_x d^4 + 4q d^3 d_x) h_y \right. \\ & \quad \left. - (-4c_2 d^3 d_y - q_y + q_y d^4 + 4q d^3 d_y) h_x \right] \\ & + \frac{2}{h^3} \left[ (c_2 - c_2 d^4 - q + q d^4) h_x h_y \right], \end{aligned} \quad (\text{A55})$$

$$\begin{aligned} v_{xz} = & \frac{1}{h} \left[ -12c_2 d^2 d_x d_z - 4c_2 d^3 d_{xz} + 4q_x d^3 d_z + 12q d^2 d_x d_z + 4q d^3 d_{xz} \right] \\ & - \frac{1}{h^2} \left[ (-4c_2 d^3 d_z + 4q d^3 d_z) h_x \right], \end{aligned} \quad (\text{A56})$$

$$\begin{aligned} v_{yy} = & \frac{1}{h} \left[ -12c_2 d^2 d_y^2 - 4c_2 d^3 d_{yy} - q_{yy} + q_{yy} d^4 + 8q_y d^3 d_y + 12q d^2 d_y^2 + 4q d^3 d_{yy} \right] \\ & + \frac{1}{h^2} \left[ -2 \left( -4c_2 d^3 d_y - q_y + q_y d^4 + 4q d^3 d_y \right) h_y - (c_2 - c_2 d^4 - q + q d^4) h_{yy} \right] \\ & + \frac{2}{h^3} \left[ (c_2 - c_2 d^4 - q + q d^4) h_y^2 \right], \end{aligned} \quad (\text{A57})$$

$$\begin{aligned} v_{yz} = & \frac{1}{h} \left[ -12c_2 d^2 d_y d_z - 4c_2 d^3 d_{yz} + 4q_y d^3 d_z + 12q d^2 d_y d_z + 4q d^3 d_{yz} \right] \\ & - \frac{1}{h^2} \left[ (-4c_2 d^3 d_z + 4q d^3 d_z) h_y \right], \end{aligned} \quad (\text{A58})$$

$$v_{zz} = \frac{1}{h} \left[ -12c_2 d^2 d_z^2 - 4c_2 d^3 d_{zz} + 12q d^2 d_z^2 + 4q d^3 d_{zz} \right], \quad (\text{A59})$$

and

$$w_x = u_x h d_x + u h_x d_x + u h d_{xx} + v_x h d_y + v h_x d_y + v h d_{xy}, \quad (\text{A60})$$

$$w_y = u_y h d_x + u h_y d_x + u h d_{xy} + v_y h d_y + v h_y d_y + v h d_{yy}, \quad (\text{A61})$$

$$w_z = u_z h d_x + u h d_{xz} + v_z h d_y + v h d_{yz}, \quad (\text{A62})$$

$$w_{xx} = u_{xx}hd_x + 2u_xh_xd_x + 2u_xhd_{xx} + uh_{xx}d_x + 2uh_xd_{xx} + uhd_{xxx} \\ + v_{xx}hd_y + 2v_xh_xd_y + 2v_xhd_{xy} + vh_{xx}d_y + 2vh_xd_{xy} + vhd_{xxy}, \quad (\text{A63})$$

$$w_{xy} = u_{xy}hd_x + u_xh_yd_x + u_xhd_{xy} + u_yh_xd_x + uh_{xy}d_x + uh_xd_{xy} + u_yhd_{xx} + uh_yd_{xx} + uhd_{xxy} \\ + v_{xy}hd_y + v_xh_yd_y + v_xhd_{yy} + v_yh_xd_y + vh_{xy}d_y + vh_xd_{yy} + v_yhd_{xy} + vh_yd_{xy} + vhd_{xyy}, \quad (\text{A64})$$

$$w_{xz} = u_{xz}hd_x + u_xhd_{xz} + u_zh_xd_x + uh_xd_{xz} + u_zhd_{xx} + uhd_{xxx} \\ + v_{xz}hd_y + v_xhd_{yz} + v_zh_xd_y + vh_xd_{yz} + v_zhd_{xy} + vhd_{xyz}, \quad (\text{A65})$$

$$w_{yy} = u_{yy}hd_x + 2u_yh_yd_x + 2u_yhd_{xy} + uh_{yy}d_x + 2uh_yd_{xy} + uhd_{xyy} \\ + v_{yy}hd_y + 2v_yh_yd_y + 2v_yhd_{yy} + vh_{yy}d_y + 2vh_yd_{yy} + vhd_{yyy}, \quad (\text{A66})$$

$$w_{yz} = u_{yz}hd_x + u_yhd_{xz} + u_zh_yd_x + uh_yd_{xz} + u_zhd_{xy} + uhd_{xyy} \\ + v_{yz}hd_y + v_yhd_{yz} + v_zh_yd_y + vh_yd_{yz} + v_zhd_{yy} + vhd_{yyz}, \quad (\text{A67})$$

$$w_{zz} = u_{zz}hd_x + 2u_zhd_{xz} + uhd_{xzz} + v_{zz}hd_y + 2v_zhd_{yz} + vhd_{yzz}. \quad (\text{A68})$$

The viscosity  $\mu$  and its derivatives are given by

$$\mu = \frac{1}{2}A^{-1/3} \left[ \frac{1}{4}(u_y + v_x)^2 + \frac{1}{4}(u_z + w_x)^2 + \frac{1}{4}(v_z + w_y)^2 - u_xv_y - u_xw_z - v_yw_z \right]^{-1/3}, \quad (\text{A69})$$

$$\mu_x = -\frac{8}{3}A\mu^4 \left[ \frac{1}{2}(u_y + v_x)(u_{xy} + v_{xx}) + \frac{1}{2}(u_z + w_x)(u_{xz} + w_{xx}) \right. \\ \left. + \frac{1}{2}(v_z + w_y)(v_{xz} + w_{xy}) - u_{xx}v_y - u_xv_{xy} - u_{xx}w_z - u_xw_{xz} - v_{xy}w_z - v_yw_{xz} \right], \quad (\text{A70})$$

$$\mu_y = -\frac{8}{3}A\mu^4 \left[ \frac{1}{2}(u_y + v_x)(u_{yy} + v_{xy}) + \frac{1}{2}(u_z + w_x)(u_{yz} + w_{xy}) \right. \\ \left. + \frac{1}{2}(v_z + w_y)(v_{yz} + w_{yy}) - u_{xy}v_y - u_xv_{yy} - u_{xy}w_z - u_xw_{yz} - v_{yy}w_z - v_yw_{yz} \right], \quad (\text{A71})$$

$$\mu_z = -\frac{8}{3}A\mu^4 \left[ \frac{1}{2}(u_y + v_x)(u_{yz} + v_{xz}) + \frac{1}{2}(u_z + w_x)(u_{zz} + w_{xz}) \right. \\ \left. + \frac{1}{2}(v_z + w_y)(v_{zz} + w_{yz}) - u_{xz}v_y - u_xv_{yz} - u_{xz}w_z - u_xw_{zz} - v_{yz}w_z - v_yw_{zz} \right]. \quad (\text{A72})$$

The pressure and its derivatives are given by

$$p = -2\mu u_x - 2\mu v_y + \rho g(s - z), \quad (\text{A73})$$

$$p_x = -2\mu_x u_x - 2\mu u_{xx} - 2\mu_x v_y - 2\mu v_{xy} + \rho g s_x, \quad (\text{A74})$$

$$p_y = -2\mu_y u_x - 2\mu u_{xy} - 2\mu_y v_y - 2\mu v_{yy} + \rho g s_y, \quad (\text{A75})$$

$$p_z = -2\mu_z u_x - 2\mu u_{xz} - 2\mu_z v_y - 2\mu v_{yz} - \rho g. \quad (\text{A76})$$

Finally the compensation terms  $F_1, F_2, F_3$  are given by

$$F_1 = 2\mu_x u_x + 2\mu u_{xx} - p_x + \mu_y(u_y + v_x) + \mu(u_{yy} + v_{xy}) + \mu_z(u_z + w_x) + \mu(u_{zz} + w_{xz}), \quad (\text{A77})$$

$$F_2 = \mu_x(u_y + v_x) + \mu(u_{xy} + v_{xx}) + 2\mu_y v_y + 2\mu v_{yy} - p_y + \mu_z(v_z + w_y) + \mu(v_{zz} + w_{yz}), \quad (\text{A78})$$

$$F_3 = \mu_x(u_z + w_x) + \mu(u_{xz} + w_{xx}) + \mu_y(v_z + w_y) + \mu(v_{yz} + w_{yy}) + 2\mu_z w_z + 2\mu w_{zz} - p_z, \quad (\text{A79})$$

and the terms  $T_1, T_2, T_3$  can be calculated using A4-A6.
